# Supplementary material
Source: publisher site journal article supplement (https://www.dovepress.com/article/588869)
Supplement: Supplementary file 1 [file 588869_Supplementary%20materials-%20Corrected%20Version.pdf]

**A**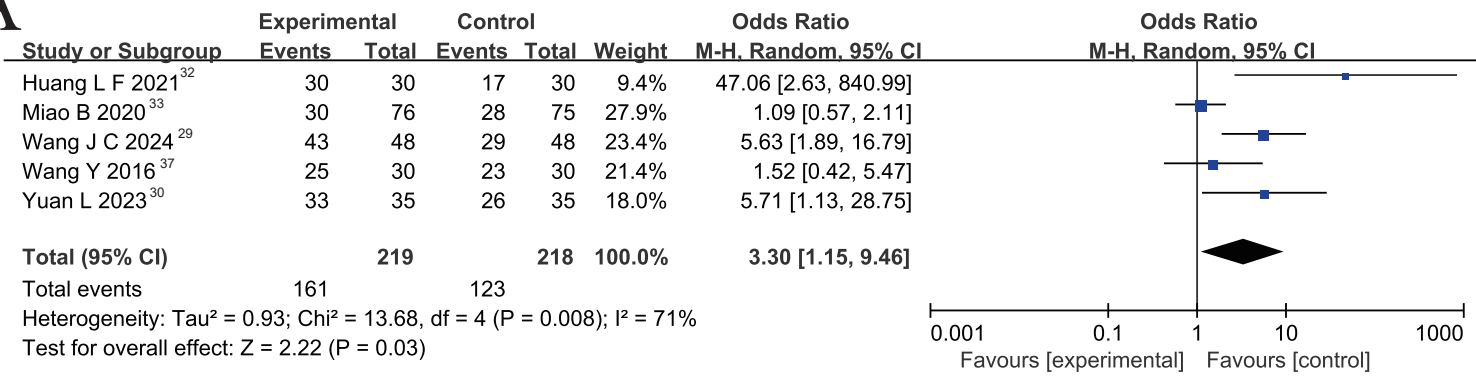**B**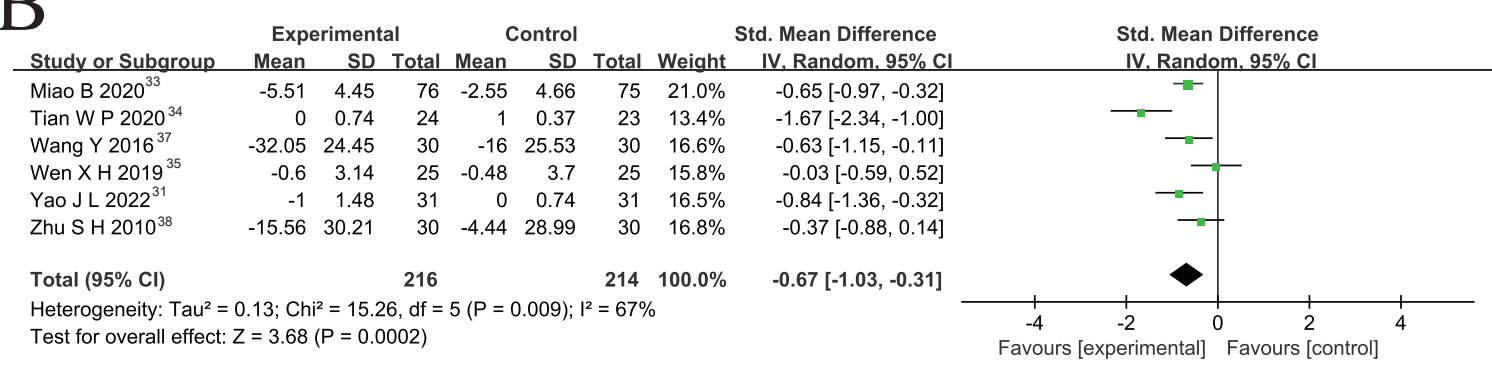**C**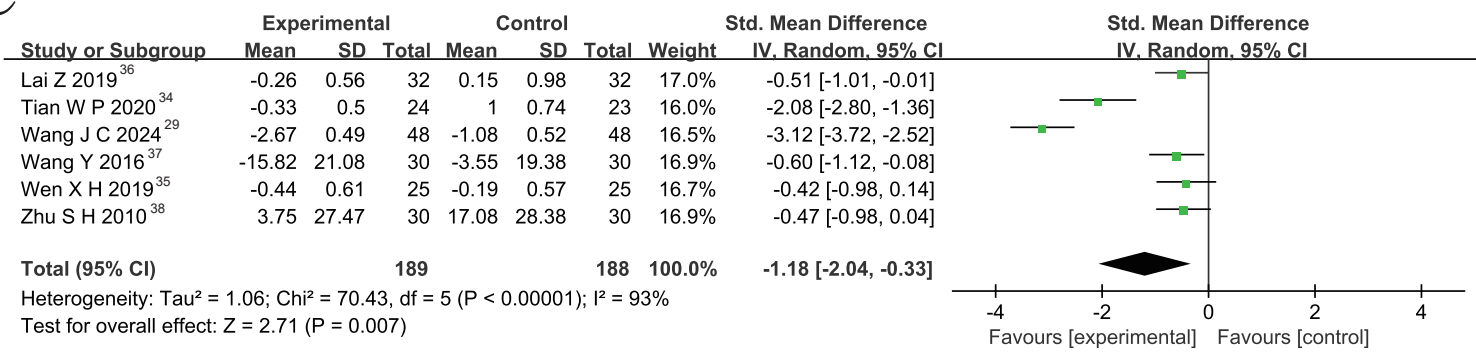**D**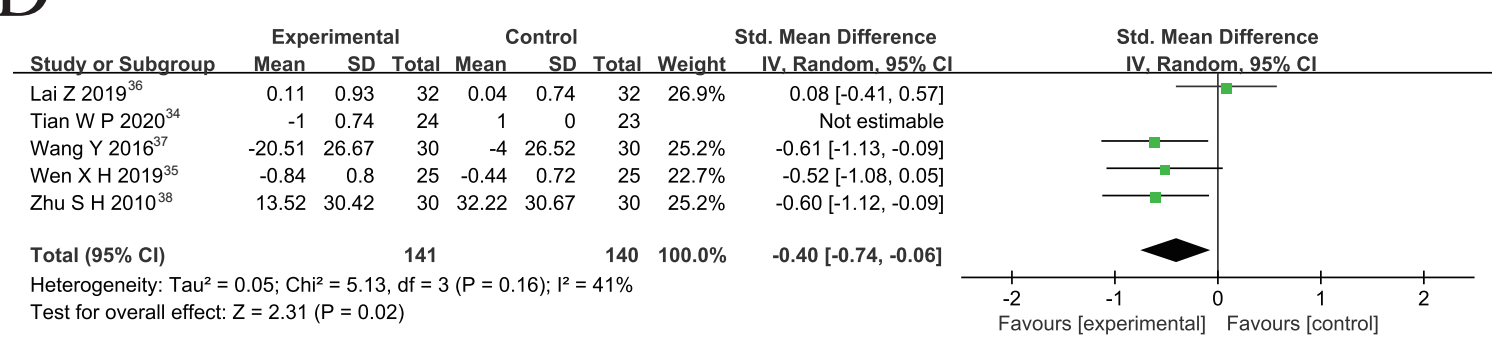

Supplementary Figure 1. Forest plots of meta-analysis. (A) Results of total effective rate. (B) Results of degree of insomnia. (C) Results of fatigue degree. (D) Results of anorexia score.

**A**

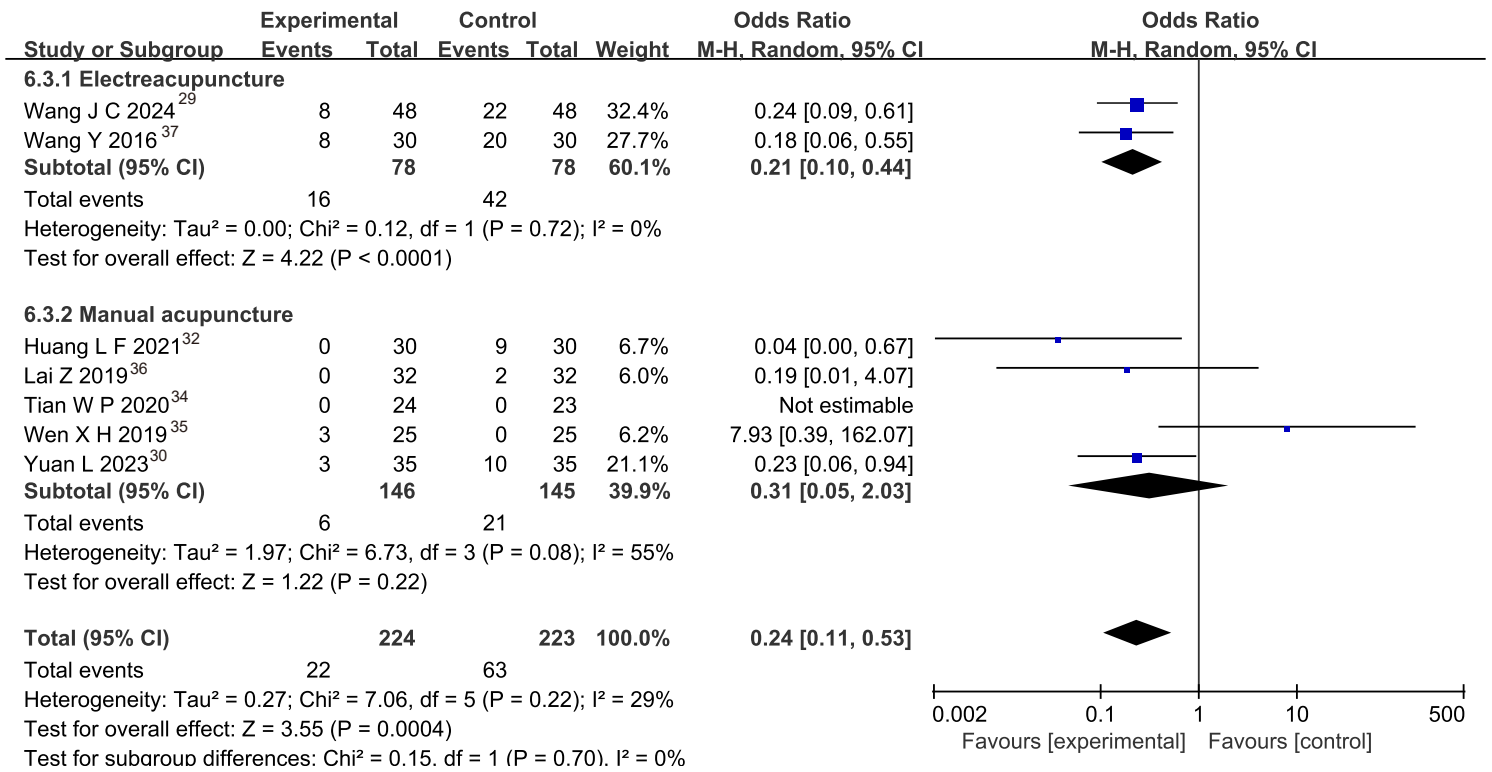

**B**

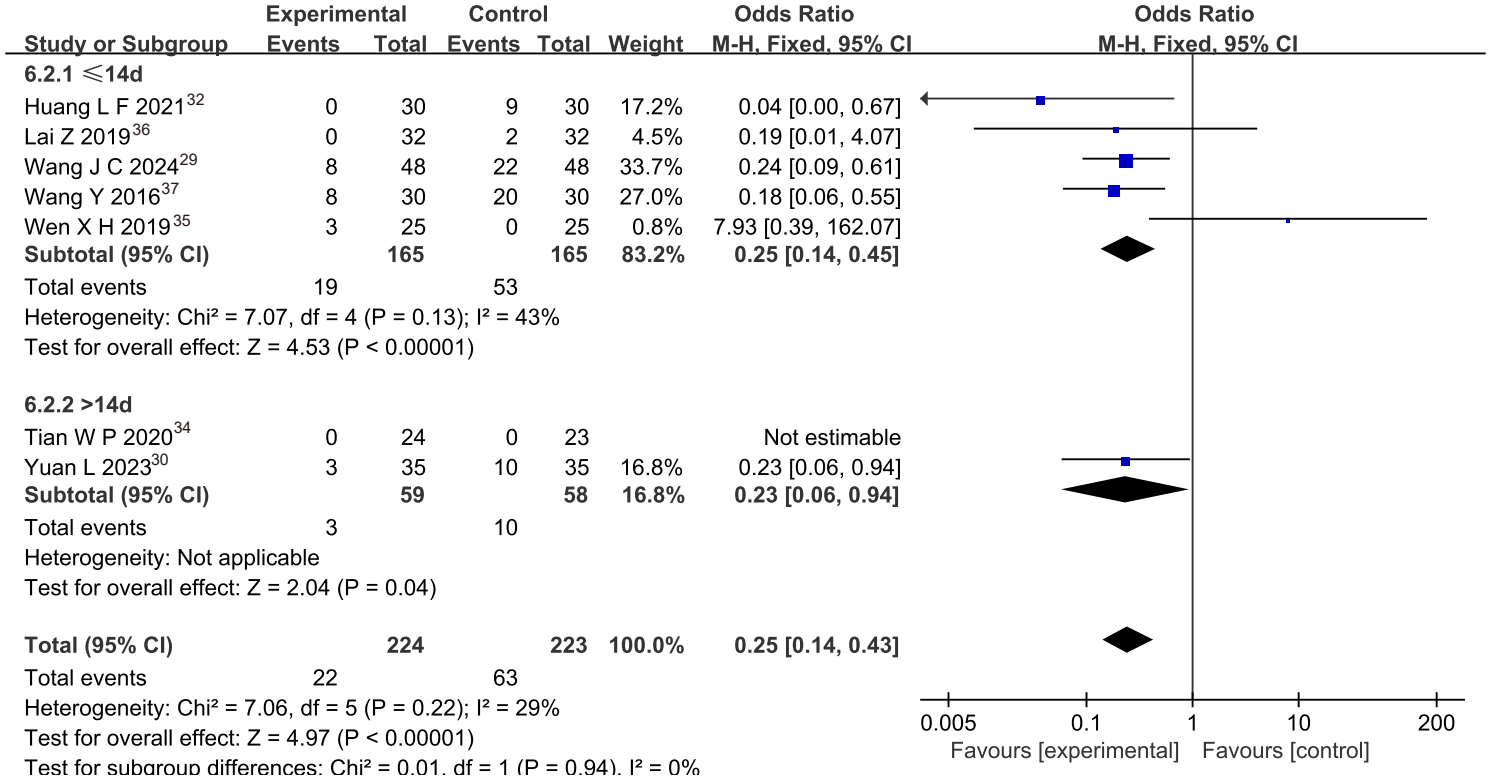

Supplementary Figure 2. Subgroup of adverse events. (A) The type of acupuncture. (B) The treatment duration.

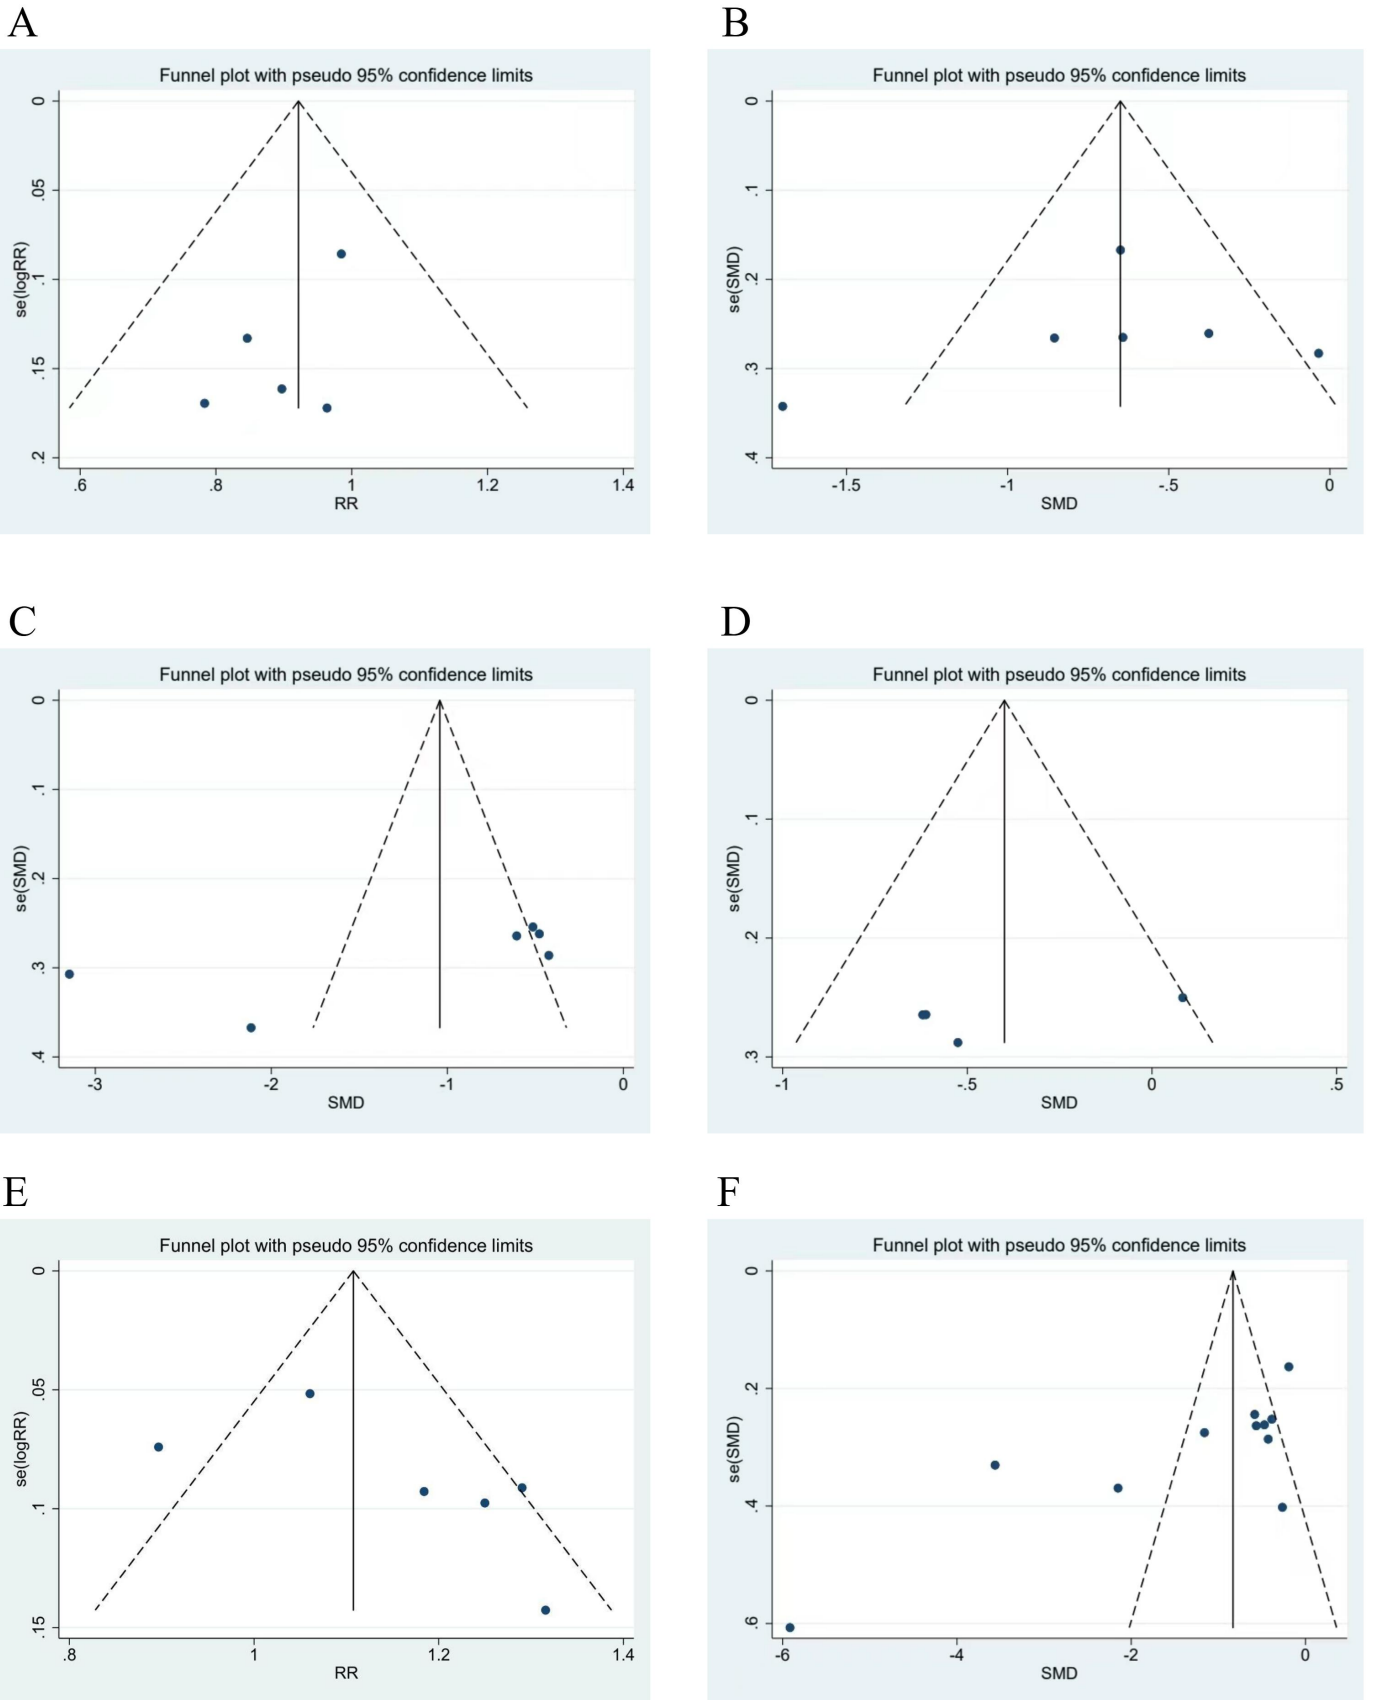

Supplementary Figure 3. Funnel plot of meta-analysis. (A) Results of total effective rate. (B) Results of degree of insomnia. (C) Results of fatigue degree. (D) Results of anorexia score. (E) Results of adverse events. (F) Results of pain intensity.

**Supplementary Table 1. Search strategy of eight databases.**

| Database list | Search strategy                                                                                                                                                                                                                                                                                                                                                                                                                                                                                                                                                                                                                                                                                                                                                                                                                                                                                                                                                                                                                                                                                                                                                                                                                                                                                                                                                                                                                                                                                                                                                                                                                                                                                                                                                                                                                                                                                                                                                                                                                                                                                              |
|---------------|--------------------------------------------------------------------------------------------------------------------------------------------------------------------------------------------------------------------------------------------------------------------------------------------------------------------------------------------------------------------------------------------------------------------------------------------------------------------------------------------------------------------------------------------------------------------------------------------------------------------------------------------------------------------------------------------------------------------------------------------------------------------------------------------------------------------------------------------------------------------------------------------------------------------------------------------------------------------------------------------------------------------------------------------------------------------------------------------------------------------------------------------------------------------------------------------------------------------------------------------------------------------------------------------------------------------------------------------------------------------------------------------------------------------------------------------------------------------------------------------------------------------------------------------------------------------------------------------------------------------------------------------------------------------------------------------------------------------------------------------------------------------------------------------------------------------------------------------------------------------------------------------------------------------------------------------------------------------------------------------------------------------------------------------------------------------------------------------------------------|
| PubMed        | <p>(Carcinoma, Non-Small-Cell Lung OR Carcinoma, Non Small Cell Lung OR Carcinomas, Non-Small-Cell Lung OR Lung Carcinoma, Non-Small-Cell OR Lung Carcinomas, Non-Small-Cell OR Non-Small-Cell Lung Carcinomas OR Carcinoma, Non-Small Cell Lung OR Non-Small Cell Lung Cancer OR Non-Small-Cell Lung Carcinoma OR Non Small Cell Lung Carcinoma OR Nonsmall Cell Lung Cancer OR Non-Small Cell Lung Carcinoma) AND pain AND (Acupuncture[Mesh] OR Pharmacopuncture OR Acupuncture therapy OR Electric needle OR Warm needle OR Puncture OR Fire needle OR Acupuncture OR Acupuncture* OR Body acupuncture OR Scalp acupuncture OR manual acupuncture OR Auricular acupuncture OR ear acupuncture OR electroacupuncture OR dermal needle OR plum blossom needle OR Pyonex OR Abdominal acupuncture)</p>                                                                                                                                                                                                                                                                                                                                                                                                                                                                                                                                                                                                                                                                                                                                                                                                                                                                                                                                                                                                                                                                                                                                                                                                                                                                                                      |
| EMbase        | <p>(non small cell lung cancer'/exp OR 'bronchial non small cell cancer' OR 'bronchial non small cell carcinoma' OR 'carcinoma, non-small-cell lung' OR 'lung cancer, non small cell' OR 'lung non small cell cancer' OR 'lung non small cell carcinoma' OR 'non oat cell lung cancer' OR 'non small cell bronchial cancer' OR 'non small cell cancer, lung' OR 'non small cell lung cancer' OR 'non small cell lung carcinoma' OR 'non small cell pulmonary cancer' OR 'non small cell pulmonary carcinoma' OR 'non squamous nsclc' OR 'non-oat cell lung cancer' OR 'non-small-cell lung carcinoma' OR 'nonsmall cell carcinoma of the lung' OR 'nonsmall cell lung cancer' OR 'nonsmall cell lung carcinoma' OR 'pulmonary non small cell cancer' OR 'pulmonary non small cell carcinoma') AND ('pain'/exp OR pain) AND ('pharmacopuncture'/exp OR pharmacopuncture OR 'herb acupuncture' OR 'herbal acupuncture' OR 'herbalized acupuncture' OR 'pharmaco-acupuncture' OR 'pharmaco-puncture' OR 'pharmacoacupuncture' OR 'pharmacopuncture' OR 'acupuncture'/exp OR acupuncture OR 'acupuncture' OR 'acupuncture therapy' OR 'shonishin' OR 'electric needle' OR 'puncture'/exp OR puncture OR 'punction' OR 'puncture' OR 'punctures' OR 'warm acupuncture'/exp OR 'burnt needle therapy' OR 'fire acupuncture' OR 'fire needle acupuncture' OR 'fire needle therapy' OR 'fire needling' OR 'heat acupuncture' OR 'heat-type acupuncture' OR 'thermal acupuncture' OR 'thermo-acupuncture' OR 'thermoacupuncture' OR 'warm acupuncture' OR 'warm needle acupuncture' OR 'body acupuncture'/exp OR 'body acupuncture' OR 'scalp acupuncture'/exp OR 'scalp acupuncture' OR 'manual acupuncture' OR 'auricular acupuncture'/exp OR 'acupuncture, ear' OR 'acupuncture, earlobe' OR 'auricular acupuncture' OR 'auriculo-acupuncture' OR 'auriculoacupuncture' OR 'auriculotherapy' OR 'ear acupuncture' OR 'earlobe acupuncture' OR electroacupuncture OR 'dermal needle' OR 'plum blossom needle'/exp OR 'plum blossom needle' OR pyonex OR 'abdominal acupuncture'/exp OR 'abdominal acupuncture')</p> |
| Cochrane      | <p>"Carcinoma, Non-Small-Cell Lung" OR "Carcinoma, Non Small Cell Lung" OR "Carcinomas, Non-Small-Cell Lung" OR "Lung Carcinoma, Non-Small-Cell" OR "Lung Carcinomas, Non-Small-Cell" OR "Non-Small-Cell Lung Carcinomas" OR "Carcinoma, Non-Small Cell Lung" OR "Non-Small Cell Lung Cancer" OR "Non-Small-Cell Lung Carcinoma" OR "Non Small Cell Lung Carcinoma" OR "Nonsmall Cell Lung Cancer" OR "Non-Small Cell Lung Carcinoma" in Title Abstract Keyword AND pain in Title Abstract Keyword AND "Acupuncture" OR "Pharmacopuncture" OR "Acupuncture therapy" OR "Electric needle" OR "Warm needle" OR</p>                                                                                                                                                                                                                                                                                                                                                                                                                                                                                                                                                                                                                                                                                                                                                                                                                                                                                                                                                                                                                                                                                                                                                                                                                                                                                                                                                                                                                                                                                             |

|                |                                                                                                                                                                                                                                                                                                                                                                                                                                                                                                                                                                                                                                                                                                                                                                                                                                                                                                                                                                                                                                                                                                                                                  |
|----------------|--------------------------------------------------------------------------------------------------------------------------------------------------------------------------------------------------------------------------------------------------------------------------------------------------------------------------------------------------------------------------------------------------------------------------------------------------------------------------------------------------------------------------------------------------------------------------------------------------------------------------------------------------------------------------------------------------------------------------------------------------------------------------------------------------------------------------------------------------------------------------------------------------------------------------------------------------------------------------------------------------------------------------------------------------------------------------------------------------------------------------------------------------|
| Web of science | <p>"Puncture" OR "Fire needle" OR "Acupuncture" OR "Acupuncture*" OR "Body acupuncture" OR "Scalp acupuncture" OR "manual acupuncture" OR "Auricular acupuncture" OR "ear acupuncture" OR "electroacupuncture" OR "dermal needle" OR "plum blossom needle" OR "Pyonex" OR "Abdominal acupuncture" in Title Abstract Keyword</p> <p>((TS=(Carcinoma, Non-Small-Cell Lung OR Carcinoma, Non Small Cell Lung OR Carcinomas, Non-Small-Cell Lung OR Lung Carcinoma, Non-Small-Cell OR Lung Carcinomas, Non-Small-Cell OR Non-Small-Cell Lung Carcinomas OR Carcinoma, Non-Small Cell Lung OR Non-Small Cell Lung Cancer OR Non-Small-Cell Lung Carcinoma OR Non Small Cell Lung Carcinoma OR Nonsmall Cell Lung Cancer OR Non-Small Cell Lung Carcinoma)) AND TS=(pain)) AND TS=(Acupuncture OR Pharmacopuncture OR Acupuncture therapy OR Electric needle OR Warm needle OR Puncture OR Fire needle OR Acupuncture OR Acupuncture* OR Body acupuncture OR Scalp acupuncture OR manual acupuncture OR Auricular acupuncture OR ear acupuncture OR electroacupuncture OR dermal needle OR plum blossom needle OR Pyonex OR Abdominal acupuncture)</p> |
| CNKI           | <p>(篇关摘:癌,非小细胞肺 + 非小细胞肺癌(精确)) AND (篇关摘:针灸 + 针刺 + 温针灸 + 温针疗法 + 电针 + 毫针 + 体针 + 铍针 + 耳针 + 针刺,耳 + 干针 + 针刀 + 小刀针 + 小针刀 + 浮针 + 腹针 + 针灸疗法 + 微针 + 微波针刺 + 微波针灸(精确)) AND (全文:疼痛 + 癌痛(精确))</p>                                                                                                                                                                                                                                                                                                                                                                                                                                                                                                                                                                                                                                                                                                                                                                                                                                                                                                                                                              |
| CBM            | <p>("非小细胞肺癌"[全部字段:智能] OR "癌, 非小细胞肺癌"[全部字段:智能] OR "肺癌, 非小细胞"[全部字段:智能]) AND ("疼痛"[全部字段:智能] OR "癌痛"[全部字段:智能]) AND ("针灸"[全部字段:智能] OR "温针灸"[全部字段:智能] OR "电针"[全部字段:智能] OR "针刺"[全部字段:智能] OR "火针"[全部字段:智能] OR "水针"[全部字段:智能] OR "梅花针"[全部字段:智能] OR "针刀"[全部字段:智能] OR "毫针"[全部字段:智能] OR "针"[全部字段:智能] OR "芒针"[全部字段:智能] OR "艾灸"[全部字段:智能] OR "耳针"[全部字段:智能])</p>                                                                                                                                                                                                                                                                                                                                                                                                                                                                                                                                                                                                                                                                                                                                                                                                  |
| Wanfang        | <p>全部:(针灸 OR 针刺 OR 温针灸 OR 温针疗法 OR 电针 OR 毫针 OR 体针 OR 铍针 OR 耳针 OR 针刺, 耳 OR 干针 OR 针刀 OR 小刀针 OR 小针刀 OR 浮针 OR 腹针 OR 针灸疗法 OR 微针 OR 微波针刺 OR 微波针灸) and 全部:(癌,非小细胞肺 OR 非小细胞肺癌) and 全部:(疼痛 OR 癌痛)</p>                                                                                                                                                                                                                                                                                                                                                                                                                                                                                                                                                                                                                                                                                                                                                                                                                                                                                                                                                      |
| CQVIP          | <p>主题=非小细胞肺癌 OR 癌, 非小细胞肺癌 OR 肺癌, 非小细胞 AND 主题=疼痛 OR 癌痛 AND 主题=针灸 OR 温针灸 OR 电针 OR 针刺 OR 火针 OR 水针 OR 梅花针 OR 针刀 OR 毫针 OR 针 OR 芒针 OR 艾灸 OR 耳针</p>                                                                                                                                                                                                                                                                                                                                                                                                                                                                                                                                                                                                                                                                                                                                                                                                                                                                                                                                                                                                     |

---

**Supplementary Table 2. The assessment of risk of bias**

**Huang L F 2021<sup>32</sup>**

| <b>Bias</b>                                               | <b>Authors' judgement</b> | <b>Support for judgement</b>                                                         |
|-----------------------------------------------------------|---------------------------|--------------------------------------------------------------------------------------|
| Random sequence generation (selection bias)               | Unclear risk              | Not mentioned                                                                        |
| Allocation concealment (selection bias)                   | Unclear risk              | Not mentioned                                                                        |
| Blinding of participants and personnel (performance bias) | Unclear risk              | Not mentioned                                                                        |
| Blinding of outcome assessment (detection bias)           | Unclear risk              | Not mentioned                                                                        |
| Incomplete outcome data (attrition bias)                  | Low risk                  | No missing outcome data                                                              |
| Selective reporting (reporting bias)                      | Low risk                  | The protocol is available, and all prespecified outcomes are reported                |
| Other bias                                                | Unclear risk              | There was no good reason or evidence that the existing question would introduce bias |

**Lai Z 2019<sup>36</sup>**

| <b>Bias</b>                                               | <b>Authors' judgement</b> | <b>Support for judgement</b>                                                                                                              |
|-----------------------------------------------------------|---------------------------|-------------------------------------------------------------------------------------------------------------------------------------------|
| Random sequence generation (selection bias)               | Low risk                  | Use SPSS21.0 Statistical software to generate random number                                                                               |
| Allocation concealment (selection bias)                   | Low risk                  | Random numbers and group assigned were kept in sealed opaque envelopes.                                                                   |
| Blinding of participants and personnel (performance bias) | Unclear risk              | Not mentioned                                                                                                                             |
| Blinding of outcome assessment (detection bias)           | Unclear risk              | Not mentioned                                                                                                                             |
| Incomplete outcome data (attrition bias)                  | Low risk                  | Missing data were missing completely at random, and the dropout rate was less than 10%. Excluding missing data would not bias the results |
| Selective reporting (reporting bias)                      | Low risk                  | The protocol is available, and all prespecified outcomes are reported                                                                     |
| Other bias                                                | Unclear risk              | There was no good reason or evidence that the existing question would introduce bias                                                      |

**Miao B 2020<sup>33</sup>**

| <b>Bias</b> | <b>Authors'</b> | <b>Support for judgement</b> |
|-------------|-----------------|------------------------------|
|-------------|-----------------|------------------------------|

|                                                           | <b>judgement</b> |                                                                                                                  |
|-----------------------------------------------------------|------------------|------------------------------------------------------------------------------------------------------------------|
| Random sequence generation (selection bias)               | Low risk         | Using a random number table                                                                                      |
| Allocation concealment (selection bias)                   | Low risk         | The patients were randomly divided into two groups according to the order of visit by random number table method |
| Blinding of participants and personnel (performance bias) | Unclear risk     | Not mentioned                                                                                                    |
| Blinding of outcome assessment (detection bias)           | Unclear risk     | Not mentioned                                                                                                    |
| Incomplete outcome data (attrition bias)                  | Low risk         | No missing outcome data                                                                                          |
| Selective reporting (reporting bias)                      | Low risk         | The protocol is available, and all prespecified outcomes are reported                                            |
| Other bias                                                | Unclear risk     | There was no good reason or evidence that the existing question would introduce bias                             |

**Randolph H L 2006<sup>39</sup>**

| <b>Bias</b>                                               | <b>Authors' judgement</b> | <b>Support for judgement</b>                                                                                                                   |
|-----------------------------------------------------------|---------------------------|------------------------------------------------------------------------------------------------------------------------------------------------|
| Random sequence generation (selection bias)               | Low risk                  | Computer-generated random numbers were used                                                                                                    |
| Allocation concealment (selection bias)                   | Low risk                  | Random numbers and group assigned were kept in sealed opaque envelopes.                                                                        |
| Blinding of participants and personnel (performance bias) | Low risk                  | The participants and personnel were blinded                                                                                                    |
| Blinding of outcome assessment (detection bias)           | Low risk                  | The assessors were blinded                                                                                                                     |
| Incomplete outcome data (attrition bias)                  | Low risk                  | Data on each primary outcome measure are fully reported, including the number, reasons for, and management of loss to follow-up and withdrawal |
| Selective reporting (reporting bias)                      | Unclear risk              | There was insufficient information to determine low or high risk                                                                               |
| Other bias                                                | Low risk                  | No other sources of bias                                                                                                                       |

**Tian W P 2020<sup>34</sup>**

| <b>Bias</b>                                 | <b>Authors' judgement</b> | <b>Support for judgement</b>                                            |
|---------------------------------------------|---------------------------|-------------------------------------------------------------------------|
| Random sequence generation (selection bias) | Low risk                  | Using a random number table                                             |
| Allocation concealment (selection bias)     | Low risk                  | Random numbers and group assigned were kept in sealed opaque envelopes. |

|                                                           |              |                                                                                                                                                |
|-----------------------------------------------------------|--------------|------------------------------------------------------------------------------------------------------------------------------------------------|
| Blinding of participants and personnel (performance bias) | Unclear risk | Not mentioned                                                                                                                                  |
| Blinding of outcome assessment (detection bias)           | Unclear risk | Not mentioned                                                                                                                                  |
| Incomplete outcome data (attrition bias)                  | Low risk     | Data on each primary outcome measure are fully reported, including the number, reasons for, and management of loss to follow-up and withdrawal |
| Selective reporting (reporting bias)                      | Low risk     | The protocol is available, and all prespecified outcomes are reported                                                                          |
| Other bias                                                | Low risk     | No other sources of bias                                                                                                                       |

**Wang J C 2024<sup>29</sup>**

| <b>Bias</b>                                               | <b>Authors' judgement</b> | <b>Support for judgement</b>                                            |
|-----------------------------------------------------------|---------------------------|-------------------------------------------------------------------------|
| Random sequence generation (selection bias)               | Low risk                  | Using a random number table                                             |
| Allocation concealment (selection bias)                   | Low risk                  | Random numbers and group assigned were kept in sealed opaque envelopes. |
| Blinding of participants and personnel (performance bias) | Unclear risk              | Not mentioned                                                           |
| Blinding of outcome assessment (detection bias)           | Unclear risk              | Not mentioned                                                           |
| Incomplete outcome data (attrition bias)                  | Low risk                  | No missing outcome data                                                 |
| Selective reporting (reporting bias)                      | Low risk                  | The protocol is available, and all prespecified outcomes are reported   |
| Other bias                                                | Low risk                  | No other sources of bias                                                |

**Wang Y 2016<sup>37</sup>**

| <b>Bias</b>                                               | <b>Authors' judgement</b> | <b>Support for judgement</b> |
|-----------------------------------------------------------|---------------------------|------------------------------|
| Random sequence generation (selection bias)               | Low risk                  | Random number method         |
| Allocation concealment (selection bias)                   | Unclear risk              | Not mentioned                |
| Blinding of participants and personnel (performance bias) | Unclear risk              | Not mentioned                |
| Blinding of outcome assessment (detection bias)           | Unclear risk              | Not mentioned                |
| Incomplete outcome data (attrition bias)                  | Low risk                  | No missing outcome data      |

|                                      |              |                                                                                      |
|--------------------------------------|--------------|--------------------------------------------------------------------------------------|
| Selective reporting (reporting bias) | Low risk     | The protocol is available, and all prespecified outcomes are reported                |
| Other bias                           | Unclear risk | There was no good reason or evidence that the existing question would introduce bias |

**Wen X H 2019<sup>35</sup>**

| <b>Bias</b>                                               | <b>Authors' judgement</b> | <b>Support for judgement</b>                                                                                                                   |
|-----------------------------------------------------------|---------------------------|------------------------------------------------------------------------------------------------------------------------------------------------|
| Random sequence generation (selection bias)               | Low risk                  | In Excel, use the "RAND ()" function to generate random numbers                                                                                |
| Allocation concealment (selection bias)                   | Low risk                  | Allocation hiding is achieved by using random number generation and sorting                                                                    |
| Blinding of participants and personnel (performance bias) | Low risk                  | The participants and personnel were blinded                                                                                                    |
| Blinding of outcome assessment (detection bias)           | Low risk                  | The assessors were blinded                                                                                                                     |
| Incomplete outcome data (attrition bias)                  | Low risk                  | Data on each primary outcome measure are fully reported, including the number, reasons for, and management of loss to follow-up and withdrawal |
| Selective reporting (reporting bias)                      | Low risk                  | The protocol is available, and all prespecified outcomes are reported                                                                          |
| Other bias                                                | Low risk                  | No other sources of bias                                                                                                                       |

**Yao J L 2022<sup>31</sup>**

| <b>Bias</b>                                               | <b>Authors' judgement</b> | <b>Support for judgement</b>                                                                                                                             |
|-----------------------------------------------------------|---------------------------|----------------------------------------------------------------------------------------------------------------------------------------------------------|
| Random sequence generation (selection bias)               | Low risk                  | Random numbers are generated by third-party personnel using SPSS25.0 software                                                                            |
| Allocation concealment (selection bias)                   | Low risk                  | Random numbers are generated by third-party personnel using SPSS25.0 software<br>Patients were randomly divided into observation group and control group |
| Blinding of participants and personnel (performance bias) | High risk                 | This was an unblinded study                                                                                                                              |
| Blinding of outcome assessment (detection bias)           | High risk                 | This was an unblinded study                                                                                                                              |
| Incomplete outcome data (attrition bias)                  | Low risk                  | No missing outcome data                                                                                                                                  |
| Selective reporting (reporting bias)                      | Low risk                  | The protocol is available, and all prespecified outcomes are reported                                                                                    |
| Other bias                                                | Low risk                  | No other sources of bias                                                                                                                                 |

**Yuan L 2023<sup>30</sup>**

| <b>Bias</b>                                               | <b>Authors' judgement</b> | <b>Support for judgement</b>                                          |
|-----------------------------------------------------------|---------------------------|-----------------------------------------------------------------------|
| Random sequence generation (selection bias)               | Low risk                  | Using a random number table                                           |
| Allocation concealment (selection bias)                   | Unclear risk              | Not mentioned                                                         |
| Blinding of participants and personnel (performance bias) | Unclear risk              | Not mentioned                                                         |
| Blinding of outcome assessment (detection bias)           | Unclear risk              | Not mentioned                                                         |
| Incomplete outcome data (attrition bias)                  | Low risk                  | No missing outcome data                                               |
| Selective reporting (reporting bias)                      | Low risk                  | The protocol is available, and all prespecified outcomes are reported |
| Other bias                                                | Low risk                  | No other sources of bias                                              |

**Zhu S H 2010<sup>38</sup>**

| <b>Bias</b>                                               | <b>Authors' judgement</b> | <b>Support for judgement</b>                                                                                      |
|-----------------------------------------------------------|---------------------------|-------------------------------------------------------------------------------------------------------------------|
| Random sequence generation (selection bias)               | Low risk                  | Using a random number table                                                                                       |
| Allocation concealment (selection bias)                   | Low risk                  | The patients were numbered according to the enrollment time and divided into groups by random number table method |
| Blinding of participants and personnel (performance bias) | Unclear risk              | Not mentioned                                                                                                     |
| Blinding of outcome assessment (detection bias)           | Unclear risk              | Not mentioned                                                                                                     |
| Incomplete outcome data (attrition bias)                  | Unclear risk              | Two cases dropped out, and the reasons were not reported                                                          |
| Selective reporting (reporting bias)                      | Low risk                  | The protocol is available, and all prespecified outcomes are reported                                             |
| Other bias                                                | Low risk                  | No other sources of bias                                                                                          |

**Supplementary Table 3. Sensitivity analyses for outcomes: (A) Pain Intensity. (B) Adverse Events. (C) Total Effective Rate. (D) Degree of Insomnia. (E) Fatigue Degree. (F) Anorexia Score.**

**A**

| Excluded study                  | Intervention group(n) | Control group(n) | RR/SMD (95% CI)      | P value | Heterogeneity test            | Effect model |
|---------------------------------|-----------------------|------------------|----------------------|---------|-------------------------------|--------------|
| Before excluding                | 374                   | 371              | -1.33[-2.02, -0.63]  | <0.001  | P <0.001, I <sup>2</sup> =94% | Random       |
| Huang L F 2021 <sup>32</sup>    | 344                   | 341              | -0.95 [-1.51, -0.38] | 0.001   | P <0.001, I <sup>2</sup> =91% | Random       |
| Lai Z 2019 <sup>36</sup>        | 342                   | 339              | -1.43 [-2.20, -0.66] | <0.001  | P <0.001, I <sup>2</sup> =95% | Random       |
| Miao B 2020 <sup>33</sup>       | 298                   | 296              | -1.46 [-2.24, -0.68] | <0.001  | P <0.001, I <sup>2</sup> =94% | Random       |
| Randolph H L 2006 <sup>39</sup> | 361                   | 359              | -1.43 [-2.17, -0.69] | <0.001  | P <0.001, I <sup>2</sup> =95% | Random       |
| Tian W P 2020 <sup>34</sup>     | 350                   | 348              | -1.25 [-1.97, -0.53] | <0.001  | P <0.001, I <sup>2</sup> =94% | Random       |
| Wang J C 2024 <sup>29</sup>     | 326                   | 323              | -1.06 [-1.65, -0.48] | <0.001  | P <0.001, I <sup>2</sup> =91% | Random       |
| Wang Y 2016 <sup>37</sup>       | 344                   | 341              | -1.41 [-2.18, -0.65] | <0.001  | P <0.001, I <sup>2</sup> =95% | Random       |
| Wen X H 2019 <sup>35</sup>      | 349                   | 346              | -1.42 [-2.18, -0.67] | <0.001  | P <0.001, I <sup>2</sup> =95% | Random       |
| Yao J L 2022 <sup>31</sup>      | 343                   | 340              | -1.35 [-2.11, -0.59] | <0.001  | P <0.001, I <sup>2</sup> =95% | Random       |
| Yuan L 2023 <sup>30</sup>       | 339                   | 336              | -1.41 [-2.19, -0.64] | <0.001  | P <0.001, I <sup>2</sup> =95% | Random       |
| Zhu S H 2010 <sup>38</sup>      | 344                   | 341              | -1.42 [-2.19, -0.66] | <0.001  | P <0.001, I <sup>2</sup> =95% | Random       |

**B**

| Excluded study               | Intervention group(n) | Control group(n) | RR/SMD (95% CI)   | P value | Heterogeneity test           | Effect model |
|------------------------------|-----------------------|------------------|-------------------|---------|------------------------------|--------------|
| Before excluding             | 224                   | 223              | 0.25 [0.14, 0.43] | <0.001  | P =0.22, I <sup>2</sup> =29% | Fixed        |
| Huang L F 2021 <sup>32</sup> | 194                   | 193              | 0.29 [0.16, 0.51] | <0.001  | P =0.23, I <sup>2</sup> =29% | Fixed        |
| Lai Z 2019 <sup>36</sup>     | 192                   | 191              | 0.25 [0.14, 0.44] | <0.001  | P =0.13, I <sup>2</sup> =43% | Fixed        |
| Tian W P 2020 <sup>34</sup>  | 200                   | 200              | 0.25 [0.14, 0.43] | <0.001  | P =0.22, I <sup>2</sup> =29% | Fixed        |
| Wang J C 2024 <sup>29</sup>  | 176                   | 175              | 0.25 [0.13, 0.50] | <0.001  | P =0.13, I <sup>2</sup> =43% | Fixed        |
| Wang Y 2016 <sup>37</sup>    | 194                   | 193              | 0.27 [0.14, 0.51] | <0.001  | P =0.15, I <sup>2</sup> =41% | Random       |
| Wen X H 2019 <sup>35</sup>   | 199                   | 198              | 0.18 [0.10, 0.34] | <0.001  | P =0.82, I <sup>2</sup> =0%  | Random       |
| Yuan L 2023 <sup>30</sup>    | 189                   | 188              | 0.25 [0.14, 0.45] | <0.001  | P =0.13, I <sup>2</sup> =43% | Random       |

**C**

| Excluded study               | Intervention group(n) | Control group(n) | RR/SMD (95% CI)   | P value | Heterogeneity test              | Effect model |
|------------------------------|-----------------------|------------------|-------------------|---------|---------------------------------|--------------|
| Before excluding             | 219                   | 218              | 3.30 [1.15, 9.46] | <0.001  | P = 0.008, I <sup>2</sup> = 71% | Random       |
| Huang L F 2021 <sup>32</sup> | 189                   | 188              | 2.43 [0.96, 6.12] | <0.001  | P = 0.04, I <sup>2</sup> = 65%  | Random       |

|                             |     |     |                    |        |                                 |        |
|-----------------------------|-----|-----|--------------------|--------|---------------------------------|--------|
| Miao B 2020 <sup>33</sup>   | 143 | 143 | 4.79 [1.64, 13.97] | <0.001 | P = 0.12 I <sup>2</sup> = 48%   | Fixed  |
| Wang J C 2024 <sup>29</sup> | 171 | 170 | 2.87[0.82,10.01]   | <0.001 | P = 0.02, I <sup>2</sup> = 69%  | Random |
| Wang Y 2016 <sup>37</sup>   | 189 | 188 | 4.43[1.11,17.60]   | <0.001 | P = 0.004, I <sup>2</sup> = 78% | Random |
| Yuan L 2023 <sup>30</sup>   | 184 | 183 | 2.99 [0.88, 10.51] | <0.001 | P = 0.007, I <sup>2</sup> = 75% | Random |

## D

| Excluded study              | Intervention group(n) | Control group(n) | RR/SMD (95% CI)      | P value | Heterogeneity test              | Effect model |
|-----------------------------|-----------------------|------------------|----------------------|---------|---------------------------------|--------------|
| Before excluding            | 216                   | 214              | -0.67 [-1.03, -0.31] | <0.001  | P = 0.009, I <sup>2</sup> = 67% | Random       |
| Miao B 2020 <sup>33</sup>   | 140                   | 139              | -0.69[-1.17, -0.21]  | 0.005   | P = 0.004, I <sup>2</sup> = 74% | Random       |
| Tian W P 2020 <sup>34</sup> | 192                   | 191              | -0.53 [-0.78, -0.29] | <0.001  | P = 0.24 I <sup>2</sup> = 27%   | Fixed        |
| Wang Y 2016 <sup>37</sup>   | 186                   | 184              | -0.68[-1.12, -0.25]  | 0.002   | P = 0.004, I <sup>2</sup> = 74% | Random       |
| Wen X H 2019 <sup>35</sup>  | 191                   | 189              | -0.78[-1.13, -0.43]  | <0.001  | P = 0.04, I <sup>2</sup> = 60%  | Random       |
| Yao J L 2022 <sup>31</sup>  | 185                   | 183              | -0.64[-1.07, -0.21]  | 0.003   | P = 0.006, I <sup>2</sup> = 73% | Random       |
| Zhu S H 2010 <sup>38</sup>  | 186                   | 184              | -0.74[-1.15, -0.32]  | <0.001  | P = 0.007, I <sup>2</sup> = 71% | Random       |

## E

| Excluded study              | Intervention group(n) | Control group(n) | RR/SMD (95% CI)      | P value | Heterogeneity test            | Effect model |
|-----------------------------|-----------------------|------------------|----------------------|---------|-------------------------------|--------------|
| Before excluding            | 189                   | 188              | -1.18 [-2.04, -0.33] | 0.007   | P <0.001, I <sup>2</sup> =93% | Random       |
| Lai Z 2019 <sup>36</sup>    | 157                   | 156              | -1.33[-2.36, -0.29]  | 0.01    | P <0.001, I <sup>2</sup> =94% | Random       |
| Tian W P 2020 <sup>34</sup> | 165                   | 165              | -1.01[-1.95, -0.08]  | 0.03    | P <0.001, I <sup>2</sup> =93% | Random       |
| Wang J C 2024 <sup>29</sup> | 141                   | 140              | -0.77 [-1.27, -0.27] | 0.003   | P=0.002, I <sup>2</sup> = 76% | Random       |
| Wang Y 2016 <sup>37</sup>   | 159                   | 158              | -1.31[-2.35, -0.26]  | 0.01    | P <0.001, I <sup>2</sup> =94% | Random       |
| Wen X H 2019 <sup>35</sup>  | 164                   | 163              | -1.34[-2.35, -0.33]  | 0.009   | P <0.001, I <sup>2</sup> =94% | Random       |
| Zhu S H 2010 <sup>38</sup>  | 159                   | 158              | -1.33[-2.36, -0.30]  | 0.01    | P <0.001, I <sup>2</sup> =94% | Random       |

## F

| Excluded study              | Intervention group(n) | Control group(n) | RR/SMD (95% CI)      | P value | Heterogeneity test           | Effect model |
|-----------------------------|-----------------------|------------------|----------------------|---------|------------------------------|--------------|
| Before excluding            | 141                   | 140              | -0.40 [-0.74, -0.06] | 0.02    | P =0.16, I <sup>2</sup> =41% | Fixed        |
| Lai Z 2019 <sup>36</sup>    | 109                   | 108              | -0.58[-0.89, -0.27]  | <0.001  | P =0.97, I <sup>2</sup> =0%  | Fixed        |
| Tian W P 2020 <sup>34</sup> | 117                   | 117              | -0.40[-0.74, -0.06]  | 0.02    | P =0.16, I <sup>2</sup> =41% | Fixed        |
| Wang Y 2016 <sup>37</sup>   | 111                   | 110              | -0.33[-0.77, 0.10]   | 0.14    | P =0.12, I <sup>2</sup> =53% | Random       |
| Wen X H 2019 <sup>35</sup>  | 116                   | 115              | -0.37[-0.83, 0.09]   | 0.11    | P =0.09, I <sup>2</sup> =59% | Random       |
| Zhu S H 2010 <sup>38</sup>  | 111                   | 110              | -0.34[-0.78, 0.10]   | 0.13    | P =0.12, I <sup>2</sup> =53% | Random       |

**Supplementary Table 4. The process of the Egger test: (A) Total Effective Rate. (B) Pain Intensity. (C) Degree of Insomnia. (D) Anorexia Score. (E) Fatigue Degree. (F) Adverse Events.**

**A**

Egger's test

| Std_Eff | Coef.    | Std. Err. | t     | P> t  | [95% Conf. Interval] |          |
|---------|----------|-----------|-------|-------|----------------------|----------|
| slope   | 1.089377 | .108442   | 10.05 | 0.002 | .7442666             | 1.434488 |
| bias    | -1.35569 | .8394075  | -1.62 | 0.205 | -4.027059            | 1.315679 |

**B**

| Std_Eff | Coef.     | Std. Err. | t     | P> t  | [95% Conf. Interval] |           |
|---------|-----------|-----------|-------|-------|----------------------|-----------|
| slope   | 1.738498  | .8527245  | 2.04  | 0.072 | -.1904987            | 3.667495  |
| bias    | -9.927249 | 3.146999  | -3.15 | 0.012 | -17.04625            | -2.808243 |

**C**

| Std_Eff | Coef.     | Std. Err. | t     | P> t  | [95% Conf. Interval] |          |
|---------|-----------|-----------|-------|-------|----------------------|----------|
| slope   | -.2312969 | .8236602  | -0.28 | 0.793 | -2.518144            | 2.05555  |
| bias    | -1.757632 | 3.362569  | -0.52 | 0.629 | -11.09362            | 7.578356 |

**D**

| Std_Eff | Coef.     | Std. Err. | t     | P> t  | [95% Conf. Interval] |          |
|---------|-----------|-----------|-------|-------|----------------------|----------|
| slope   | 3.54117   | 3.326532  | 1.06  | 0.399 | -10.77174            | 17.85408 |
| bias    | -14.84835 | 12.51836  | -1.19 | 0.357 | -68.7105             | 39.0138  |

**E**

| Std_Eff | Coef.     | Std. Err. | t     | P> t  | [95% Conf. Interval] |          |
|---------|-----------|-----------|-------|-------|----------------------|----------|
| slope   | 4.759546  | 2.977744  | 1.60  | 0.185 | -3.507997            | 13.02709 |
| bias    | -20.60217 | 10.49936  | -1.96 | 0.121 | -49.75306            | 8.548724 |

**F**

Egger's test

| Std_Eff | Coef.    | Std. Err. | t    | P> t  | [95% Conf. Interval] |          |
|---------|----------|-----------|------|-------|----------------------|----------|
| slope   | .8337828 | .175252   | 4.76 | 0.009 | .3472052             | 1.32036  |
| bias    | 3.611645 | 2.203148  | 1.64 | 0.176 | -2.505274            | 9.728563 |

## Supplementary Table 5. Trim-and-fill test.

Meta-analysis

| Method | Pooled Est | 95% CI Lower | 95% CI Upper | Asymptotic z_value | Asymptotic p_value | No. of studies |
|--------|------------|--------------|--------------|--------------------|--------------------|----------------|
| Fixed  | -0.832     | -0.992       | -0.672       | -10.185            | 0.000              | 11             |
| Random | -1.344     | -2.043       | -0.645       | -3.768             | 0.000              |                |

Test for heterogeneity:  $Q= 179.075$  on 10 degrees of freedom ( $p= 0.000$ )  
Moment-based estimate of between studies variance = **1.294**

Trimming estimator: **Linear**

Meta-analysis type: **Random-effects model**

| iteration | estimate | Tn | # to trim | diff |
|-----------|----------|----|-----------|------|
| 1         | -1.344   | 41 | 2         | 66   |
| 2         | -1.611   | 43 | 2         | 4    |
| 3         | -1.611   | 43 | 2         | 0    |

Filled

Meta-analysis

| Method | Pooled Est | 95% CI Lower | 95% CI Upper | Asymptotic z_value | Asymptotic p_value | No. of studies |
|--------|------------|--------------|--------------|--------------------|--------------------|----------------|
| Fixed  | -1.327     | -1.467       | -1.186       | -18.456            | 0.000              | 13             |
| Random | -1.619     | -2.393       | -0.845       | -4.101             | 0.000              |                |

Test for heterogeneity:  $Q= 341.113$  on 12 degrees of freedom ( $p= 0.000$ )  
Moment-based estimate of between studies variance = **1.922**

## Supplementary Table 6. Evidence reliability result.

| Outcomes Intervention and Comparison intervention | Illustrative comparative risks* (95% CI)<br>Assumed risk<br>With comparator                                       | Corresponding risk<br>With intervention | Relative effect (95% CI)         | No of Participants (studies) | Quality of the evidence (GRADE) | Comments                   |
|---------------------------------------------------|-------------------------------------------------------------------------------------------------------------------|-----------------------------------------|----------------------------------|------------------------------|---------------------------------|----------------------------|
| <b>Pain Intensity</b>                             |                                                                                                                   |                                         |                                  |                              |                                 |                            |
| Pain intensity/                                   | The mean pain intensity in the intervention groups was <b>1.24 standard deviations lower</b> (1.91 to 0.58 lower) |                                         |                                  | 745 (11 studies)             | ⊕ ⊕ ⊕ ⊕<br><b>moderate</b>      | SMD -1.24 (-1.91 to -0.58) |
| <b>Total effective rate</b>                       |                                                                                                                   |                                         |                                  |                              |                                 |                            |
| Total effective rate/NSCLC                        | <b>Study population</b><br>564 per 1000   810 per 1000 (598 to 925)                                               |                                         | <b>OR 3.3</b><br>(1.15 to 9.46)  | 437 (5 studies)              | ⊕ ⊕ ⊕ ⊕<br><b>low</b>           |                            |
|                                                   | <b>Moderate</b><br>604 per 1000   834 per 1000 (637 to 935)                                                       |                                         |                                  |                              |                                 |                            |
| <b>Degree of insomnia</b>                         |                                                                                                                   |                                         |                                  |                              |                                 |                            |
| Degree of insomnia/NSCLC                          | The mean sleep in the intervention groups was <b>0.73 standard deviations lower</b> (1.16 to 0.3 lower)           |                                         |                                  | 430 (6 studies)              | ⊕ ⊕ ⊕ ⊕<br><b>moderate</b>      | SMD -0.73 (-1.16 to -0.3)  |
| <b>Fatigue degree</b>                             |                                                                                                                   |                                         |                                  |                              |                                 |                            |
| Fatigue degree/NSCLC                              | The mean tired in the intervention groups was <b>1.23 standard deviations lower</b> (2.12 to 0.35 lower)          |                                         |                                  | 377 (6 studies)              | ⊕ ⊕ ⊕ ⊕<br><b>moderate</b>      | SMD -1.23 (-2.12 to -0.35) |
| <b>Anorexia score</b>                             |                                                                                                                   |                                         |                                  |                              |                                 |                            |
| Anorexia score/NSCLC                              | The mean appetite in the intervention groups was <b>0.4 standard deviations lower</b> (0.74 to 0.06 lower)        |                                         |                                  | 281 (5 studies)              | ⊕ ⊕ ⊕ ⊕<br><b>low</b>           | SMD -0.4 (-0.74 to -0.06)  |
| <b>Adverse events</b>                             |                                                                                                                   |                                         |                                  |                              |                                 |                            |
| Adverse events/NSCLC                              | <b>Study population</b><br>283 per 1000   90 per 1000 (52 to 145)                                                 |                                         | <b>OR 0.25</b><br>(0.14 to 0.43) | 447 (7 studies)              | ⊕ ⊕ ⊕ ⊕<br><b>low</b>           |                            |
|                                                   | <b>Moderate</b><br>286 per 1000   91 per 1000 (53 to 147)                                                         |                                         |                                  |                              |                                 |                            |
